# Supplementary material
Source: Springer Nature journal article supplement (https://www.springermedizin.de/resource/supplementary/13075_2013_4020_MOESM5_ESM.pdf/9695828)

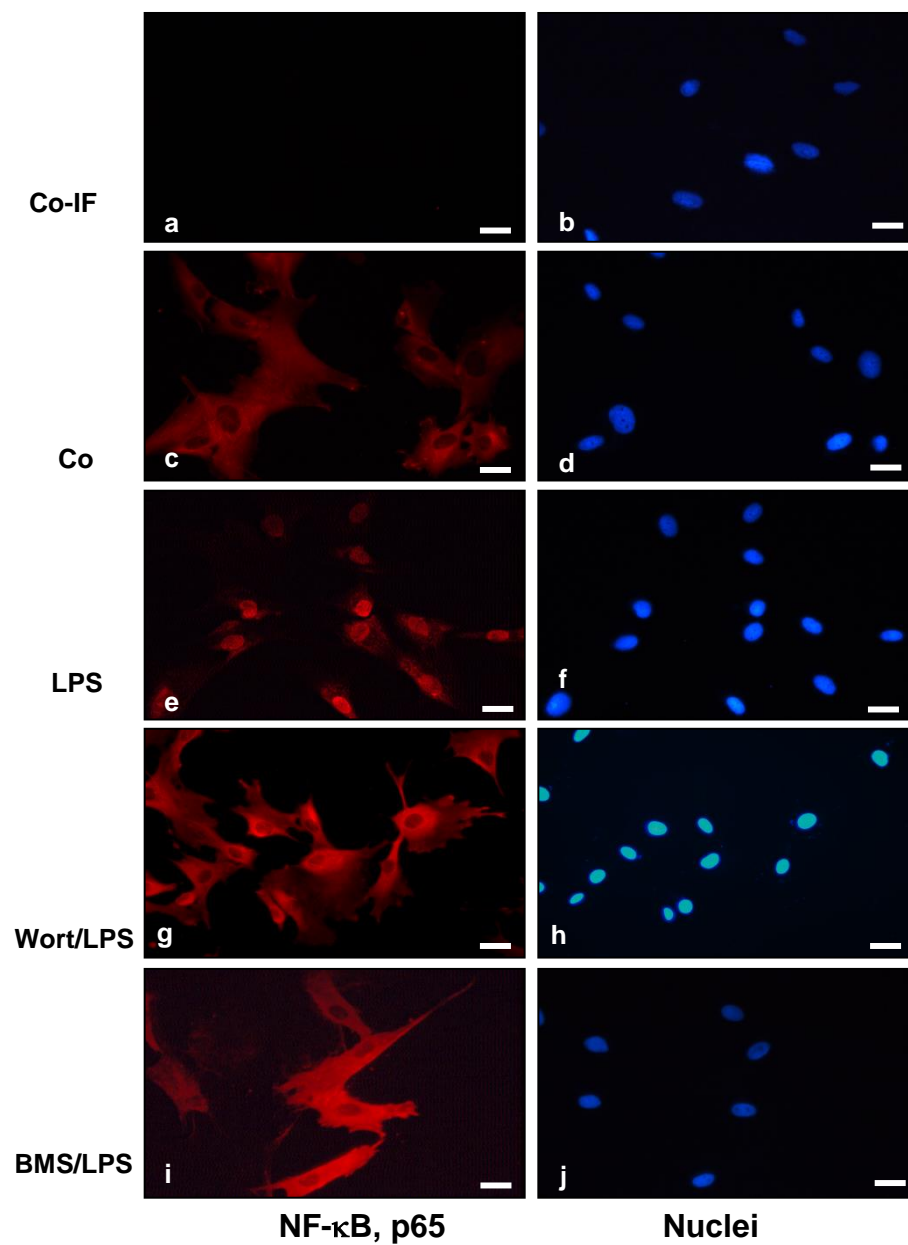

**Figure 5**

Supplement: MOESM5 [file 9695828]
